# Supplementary material
Source: PubMed Central journal article supplement (PMC3516596)
Supplement: mmc1.pdf [file mmc1.pdf]

## **Supplemental Data**

### **Copy-Number Disorders Are a Common Cause of Congenital Kidney Malformations**

Simone Sanna-Cherchi, Krzysztof Kiryluk, Katelyn E. Burgess, Monica Bodria, Matthew G. Sampson, Dexter Hadley, Shannon N. Nees, Miguel Verbitsky, Brittany J. Perry, Roel Sterken, Vladimir J. Lozanovski, Anna Materna-Kiryluk, Cristina Barlassina, Akshata Kini, Valentina Corbani, Alba Carrea, Danio Somenzi, Corrado Murtas, Nadica Ristoska-Bojkovska, Claudia Izzi, Beatrice Bianco, Marcin Zaniew, Hana Flogelova, Patricia L. Weng, Nilgun Kacak, Stefania Giberti, Maddalena Gigante, Adela Arapovic, Kristina Drnasin, Gianluca Caridi, Simona Curioni, Franca Allegri, Anita Ammenti, Stefania Ferretti, Vinicio Goj, Luca Bernardo, Vaidehi Jobanputra, Wendy K. Chung, Richard P. Lifton, Stephan Sanders, Matthew State, Lorraine N. Clark, Marijan Saraga, Sandosh Padmanabhan, Anna F. Dominiczak, Tatiana Foroud, Loreto Gesualdo, Zoran Gucev, Landino Allegri, Anna Latos-Bielenska, Daniele Cusi, Francesco Scolari, Velibor Tasic, Hakon Hakonarson, Gian Marco Ghiggeri, and Ali G. Gharavi

## Supplemental Material and Methods

### Matching Cases to Controls for Burden Analysis

In order to match a representative set of controls based on ancestry of our case cohort, we used 29,856 high quality (genotype call rates > 99.5%) and independent SNPs ( $r^2 < 0.05$  with all other SNPs) that were overlapping between all 192 cases and 15,323 controls analyzed in this study (total 15,516). The ethnic composition of this cohort includes the following ancestries: 12,753 (82.2%, including 442 Ashkenazi Jewish) White, 2,083 (13.4%) Asian, and 680 (4.4%) African. The overall genotyping rate of this dataset was 99.8%. This set was utilized for eigenvector decomposition and spectral embeddings analysis. We selected a spectral graph approach as it is more flexible, less sensitive to outliers, and offers improved performance compared to the traditional principal component analysis. Based on the genotype data, we calculated a graph Laplacian matrix, derived its eigenvectors, and tested their significance using the eigengap heuristic (SPECTRAL-GEM)<sup>1</sup>. The eigenvalues were normalized and the Euclidean distances were calculated between all subjects. We defined homogenous ancestry clusters of individuals using *k*-means Ward's clustering algorithm. The plots of principal components and the distributions of minimal distances between cases and controls (and *vice versa*) were examined visually. Based on these distributions, we excluded outliers and unmatchable cases and controls. After each round of sample exclusions, we re-run eigenvector decomposition and re-examined case-control distances.

The full dataset was decomposed into 33 significant eigenvectors and clustered into 86 homogenous clusters. In order to achieve optimal case-control matching, we eliminated over 80% of outlier and unmatchable controls in five rounds of sample exclusions (Table S4). Each round was followed by a new eigenvector and clustering analyses. The final matched dataset included 179 cases and 2,264 controls. There were only 3 significant principal components that captured most of the genetic variance in this dataset (Figure S1). This reduced set of closely matched cases and controls was used in the downstream CNV burden analyses. To assure no residual effect of population stratification, selected burden tests were also controlled for the strata defined by the cluster solution and, as a confirmatory procedure, adjusted for the three significant eigenvectors using a regression-based approach.

### Reference

1. Lee AB, Luca D, Klei L, Devlin B, Roeder K. Discovering genetic ancestry using spectral graph theory. *Genet Epidemiol*; 2010;34:51-9.

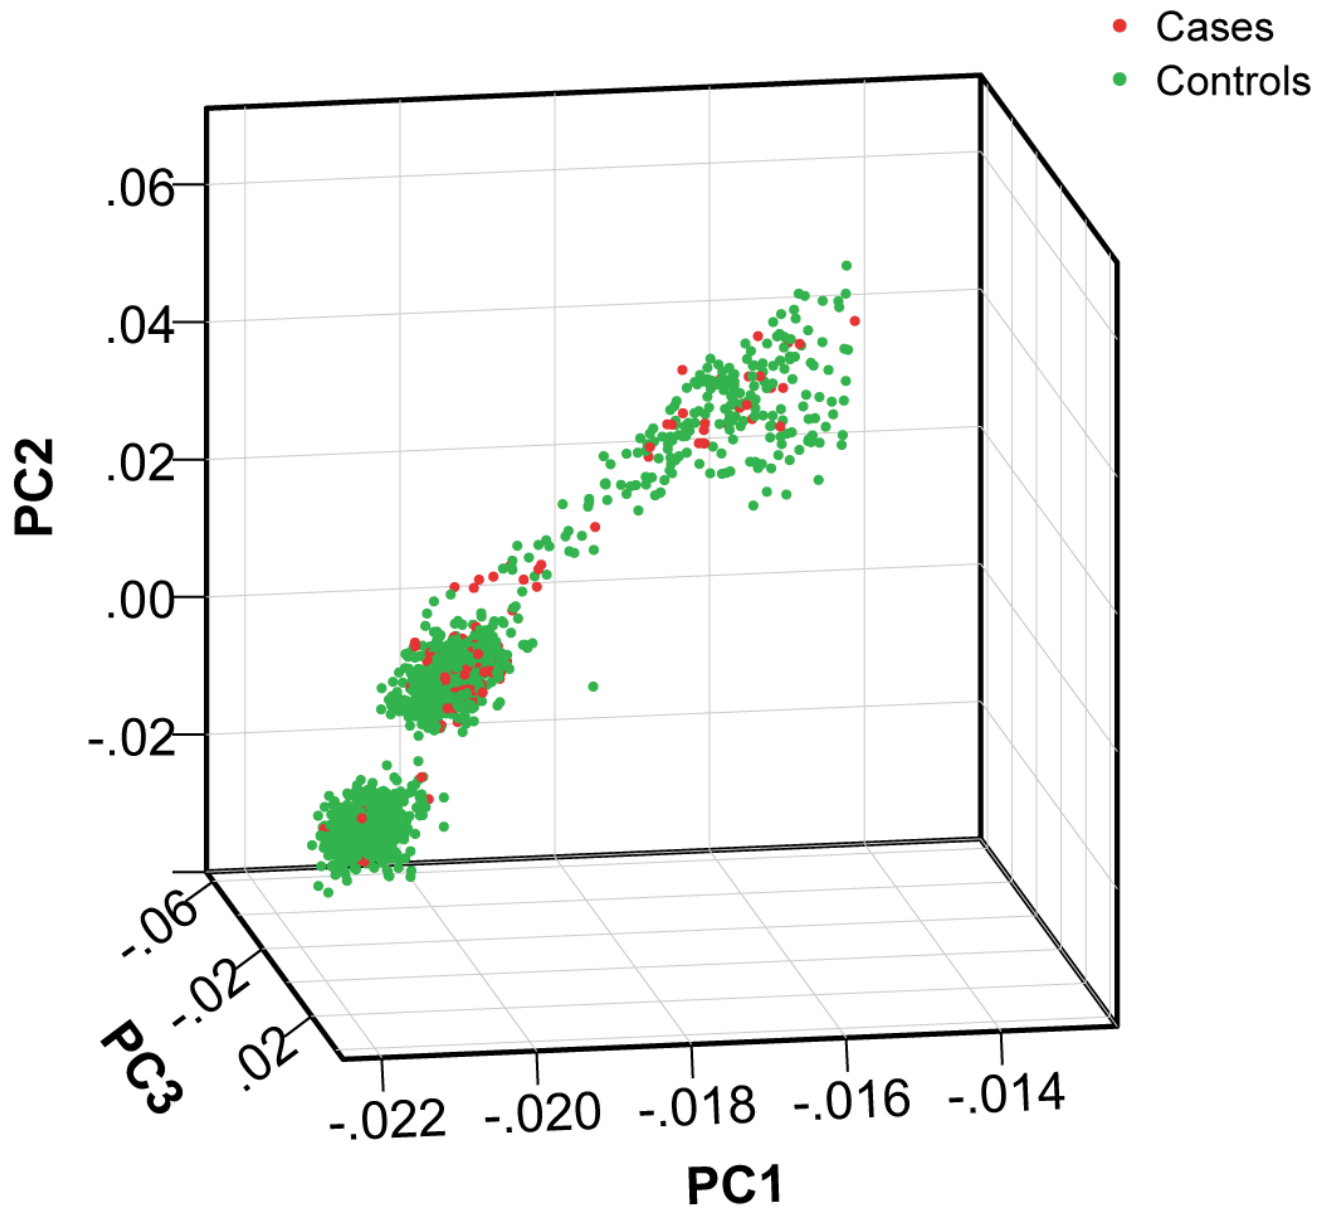

**Figure S1. Distribution of the Final Dataset of 178 RHD Cases and 1,993 Matched Controls along the Three Axes of Significant Principal Components**

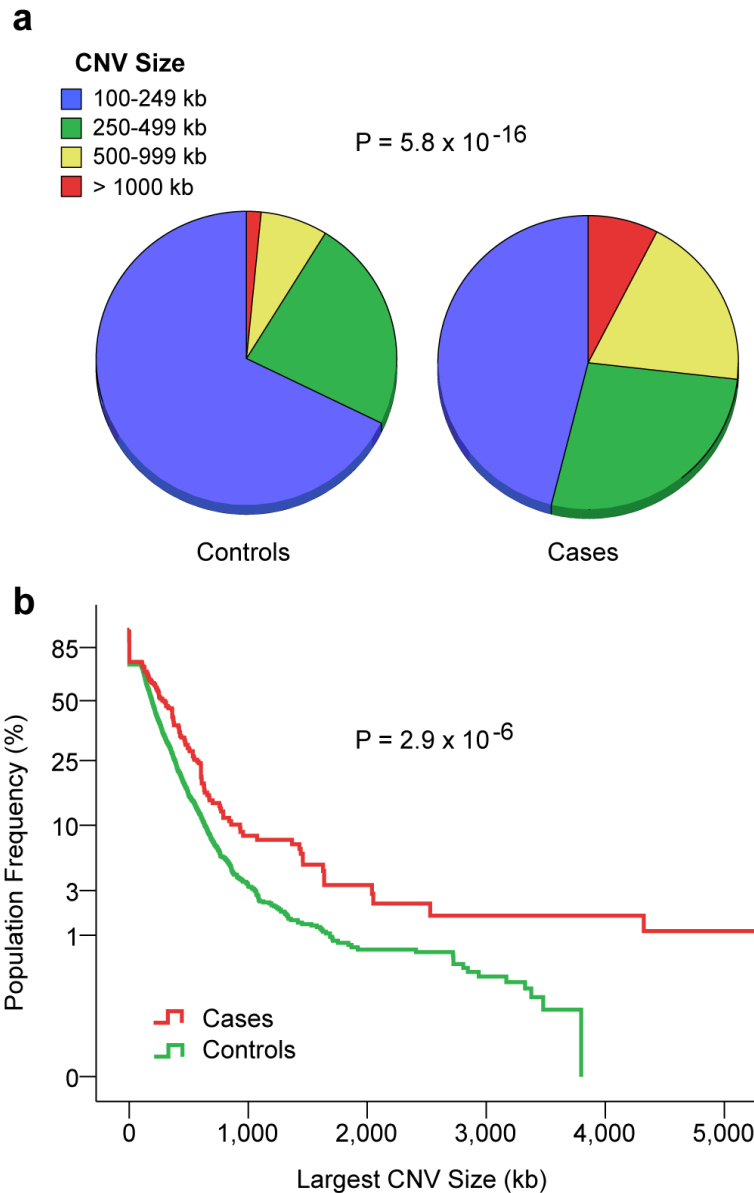

**Figure S2. Adjusted Comparison of the Largest CNV per Genome Shows Enrichment of Larger Events among RHD Cases**

(A) Distribution of large (>100 kb) rare (<1%) CNVs by size in RHD cases and genetically-matched controls.

(B) Global Differences in the largest CNV size distributions between cases and genetically-matched controls.

Repeated analysis using Cox Proportional Hazards model after adjustment for the three significant principal components and homogenous ancestry clusters yielded nearly identical results ( $P = 1.1 \times 10^{-6}$  and  $P = 2.6 \times 10^{-6}$ , respectively).

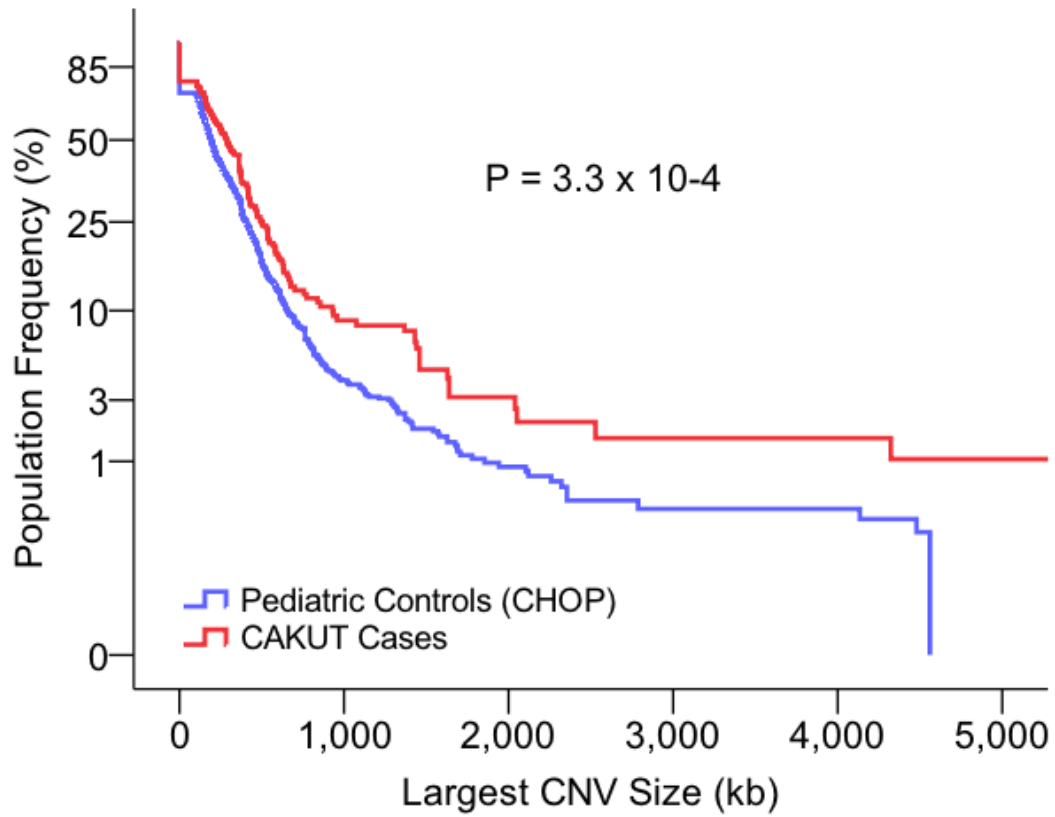

**Figure S3. Global Differences in the Largest CNV Size Distributions between Cases and Pediatric Controls from the CHOP Study**

**Table S1. Clinical Characteristics of the Cases Cohort Genotyped for the CNV Study**

|                                            | <b>Discovery<br/>(n = 192)</b> | <b>Replication 1<br/>(n = 196)</b> | <b>Replication 2<br/>(n = 134)</b> | <b>Combined<br/>(n = 522)</b> |
|--------------------------------------------|--------------------------------|------------------------------------|------------------------------------|-------------------------------|
| Males (%)                                  | 123 (64)                       | 119 (61)                           | 71 (53)                            | 313 (60)                      |
| Ethnicity (%)                              |                                |                                    |                                    |                               |
| .....White European                        | 192 (100)                      | 196 (100)                          | 84 (63)                            | 472 (90)                      |
| .....African American                      | -                              | -                                  | 32 (24)                            | 32 (6)                        |
| .....Admixed                               | -                              | -                                  | 14 (10)                            | 14 (3)                        |
| .....Other/not reported                    | -                              | -                                  | 4 (3)                              | 4 (1)                         |
| Positive family history of nephropathy (%) | 51 (27)                        | 45 (23)                            | NA                                 | 96 (25)*                      |
| Renal agenesis/solitary kidney (%)         | 107 (56)                       | 92 (47)                            | 47 (35)                            | 246 (47)                      |
| Renal hypodysplasia (%)                    | 85 (44)                        | 104 (53)                           | 87 (65)                            | 276 (53)                      |
| Complex urinary tract malformations (%)    | 59 (31)                        | 54 (27)                            | 55 (41)                            | 168 (32)                      |
| Extra-urinary tract malformations (%)      | 48 (25)                        | 41 (21)                            | 53 (40)                            | 142 (27)                      |
| Cases source (%)                           |                                |                                    |                                    |                               |
| .....CRO                                   | -                              | 26 (13)                            | -                                  | 26 (5)                        |
| .....CZE                                   | -                              | 12 (6)                             | -                                  | 12 (2)                        |
| .....ITA                                   | 126 (66)                       | 44 (22)                            | -                                  | 170 (33)                      |
| .....MCD                                   | 23 (12)                        | 63 (32)                            | -                                  | 86 (16)                       |
| .....POL                                   | 43 (22)                        | 51 (26)                            | -                                  | 94 (18)                       |
| .....USA                                   | -                              | -                                  | 134 (100)                          | 134 (26)                      |

NA= not available. \*Percentage for family history of nephropathy calculated based on 388 samples for which these data were available. Complex urinary tract malformations defined as individuals with kidney parenchymal defects *and* additional defects in the urinary tract such as vesicoureteral reflux, posterior urethral valve, duplicated ureters or ureteropelvic junction obstruction.

### Centers

CRO= University Hospital Split, Croatia

CZE= Palacky University, Olomouc, Czech Republic

ITA= Gaslini Institute, Genoa, University of Brescia, Brescia, Italy, University of Parma, Parma, Italy, University of Foggia, Foggia, Italy, and University of Milan, Milan, Italy

MCD= University Children's Hospital, Skopje, Macedonia

POL= Polish Registry of Congenital Malformations, Poznan, Poland

USA= Children's Hospital of Philadelphia, USA

**Table S2. Controls Cohorts**

| <b>Study</b>             | <b>Illumina Platform</b> | <b>WE</b>     | <b>AA</b>  | <b>ASIAN</b> | <b>TOTAL</b>  | <b>After QC</b> |
|--------------------------|--------------------------|---------------|------------|--------------|---------------|-----------------|
| Hypergenes <sup>1</sup>  | 1M-Duo                   | 3,640         | 0          | 0            | 3,640         | 3,102           |
| Glasgow HTN <sup>2</sup> | 610-Quad                 | 3,910         | 0          | 0            | 3,910         | 3,220           |
| CHOP CNV <sup>3</sup>    | 550v1-v3                 | 1,320         | 694        | 12           | 2,026         | 1,972           |
| NIA <sup>4</sup>         | 610-Quad                 | 2,921         | 136        | 4            | 3,061         | 2,748           |
| IgAN <sup>5</sup>        | 610-Quad                 | 541           | 0          | 2,096        | 2,637         | 2,360           |
| PD AJ <sup>6</sup>       | 610-Quad/660W            | 447           | 0          | 0            | 447           | 437             |
| <b>TOTAL</b>             |                          | <b>12,779</b> | <b>830</b> | <b>2,112</b> | <b>15,721</b> | <b>13,839</b>   |

WE = White European. AA= African American. Two cohorts (CHOP Control CNV Study, phs000199.v1.p1; NIA, phg000049.v1.p1) were obtained from the dbGaP repository (<http://www.ncbi.nlm.nih.gov/gap/>).

## References

1. Salvi E, Kutalik Z, Glorioso N, et al. Genomewide association study using a high-density single nucleotide polymorphism array and case-control design identifies a novel essential hypertension susceptibility locus in the promoter region of endothelial NO synthase. *Hypertension* 2012;59:248-55.
2. Padmanabhan S, Melander O, Johnson T, et al. Genome-wide association study of blood pressure extremes identifies variant near UMOD associated with hypertension. *PLoS Genet* 2010;6:e1001177.
3. Shaikh TH, Gai X, Perin JC, et al. High-resolution mapping and analysis of copy number variations in the human genome: a data resource for clinical and research applications. *Genome Res* 2009;19:1682-90.
4. Lee JH, Cheng R, Graff-Radford N, Foroud T, Mayeux R. Analyses of the National Institute on Aging Late-Onset Alzheimer's Disease Family Study: implication of additional loci. *Arch Neurol* 2008;65:1518-26.
5. Gharavi AG, Kiryluk K, Choi M, et al. Genome-wide association study identifies susceptibility loci for IgA nephropathy. *Nat Genet* 2011;43:321-7.
6. Liu X, Cheng R, Verbitsky M, et al. Genome-wide association study identifies candidate genes for Parkinson's disease in an Ashkenazi Jewish population. *BMC Med Genet* 2011;12:104.

**Table S3. Illumina Genotyping Platforms Used for the Three RHD Cohorts**

| <b>Study</b>  | <b>N Cases</b> | <b>Hap 550v1</b> | <b>Hap 550v3</b> | <b>610-Quad</b> | <b>660W</b> | <b>Omni1-Quad</b> |
|---------------|----------------|------------------|------------------|-----------------|-------------|-------------------|
| Discovery     | 192            | 0                | 0                | 155             | 37          | 0                 |
| Replication 1 | 196            | 0                | 0                | 0               | 0           | 196               |
| Replication 2 | 134            | 19               | 71               | 44              | 0           | 0                 |
| <b>Total</b>  | <b>522</b>     | <b>19</b>        | <b>71</b>        | <b>199</b>      | <b>37</b>   | <b>196</b>        |

**Table S4. Ancestry-Based Matching of Cases and Controls for CNV Burden Tests**

|                    | <b>N. of Individuals entered in the analysis</b> | <b>N. of Significant Eigenvectors</b> | <b>N. of Homogenous Clusters</b> | <b>N. of Individuals Excluded</b> |
|--------------------|--------------------------------------------------|---------------------------------------|----------------------------------|-----------------------------------|
| <b>PCA Round 1</b> | 15,332 (193 cases and 15,321 controls)           | 33                                    | 86                               | 8,610                             |
| <b>PCA Round 2</b> | 6,722 (193 cases and 6,600 controls)             | 8                                     | 34                               | 3,244                             |
| <b>PCA Round 3</b> | 3,478 (186 cases and 3,290 controls)             | 6                                     | 18                               | 797                               |
| <b>PCA Round 4</b> | 2,681 (180 cases and 2,499 controls)             | 5                                     | 12                               | 236                               |
| <b>PCA Round 5</b> | 2,445 (179 cases and 2,264 controls)             | 3                                     | 11                               | 0                                 |



**Table S5. Differences in Global CNV Counts between RHD Cases and Genetically Matched Controls**

| <b>Global CNV Metrics</b>                        | <b>RHD Cases<br/>(n = 178)</b> | <b>Genetically<br/>Matched Controls<br/>(n = 1,993)</b> | <b>p Value<br/>(Exact Test)</b> |
|--------------------------------------------------|--------------------------------|---------------------------------------------------------|---------------------------------|
| Total number of rare CNVs                        | $N_{\text{cnv}} = 291$         | $N_{\text{cnv}} = 4,330$                                |                                 |
| <b>Size Distribution of All CNVs</b>             |                                |                                                         |                                 |
| 100-250 kb                                       | 134 (46.0%)                    | 2,934 (67.8%)                                           | $5.8 \times 10^{-16}$           |
| 250-500 kb                                       | 79 (27.1%)                     | 1,015 (23.4%)                                           |                                 |
| 500-1000 kb                                      | 56 (19.2%)                     | 313 (7.2%)                                              |                                 |
| >1000 kb                                         | 22 (7.6%)                      | 68 (1.6%)                                               |                                 |
| <b>Size Distribution of Deletions</b>            |                                |                                                         |                                 |
| 100-250 kb                                       | 74 (56.6%)                     | 2,105 (74.3%)                                           | $9.6 \times 10^{-14}$           |
| 250-500 kb                                       | 27 (20.6%)                     | 585 (20.6%)                                             |                                 |
| 500-1000 kb                                      | 16 (12.2%)                     | 123 (4.3%)                                              |                                 |
| >1000 kb                                         | 14 (10.7%)                     | 20 (0.7%)                                               |                                 |
| <b>Size Distribution of Duplications</b>         |                                |                                                         |                                 |
| 100-250 kb                                       | 60 (37.5%)                     | 829 (55.4%)                                             | $8.4 \times 10^{-6}$            |
| 250-500 kb                                       | 52 (32.5%)                     | 430 (28.7%)                                             |                                 |
| 500-1000 kb                                      | 40 (25.0%)                     | 190 (12.7%)                                             |                                 |
| >1000 kb                                         | 8 (5.0%)                       | 48 (3.2%)                                               |                                 |
| <b>Size Distribution of Gene-Disrupting CNVs</b> |                                |                                                         |                                 |
| 100-250 kb                                       | 87 (42.4%)                     | 2,112 (66.8%)                                           | $1.8 \times 10^{-15}$           |
| 250-500 kb                                       | 53 (25.9%)                     | 748 (23.7%)                                             |                                 |
| 500-1000 kb                                      | 45 (22.0%)                     | 248 (7.8%)                                              |                                 |
| >1000 kb                                         | 20 (9.8%)                      | 53 (1.7%)                                               |                                 |
| <b>Size Distribution of Intergenic CNVs</b>      |                                |                                                         |                                 |
| 100-250 kb                                       | 47 (54.7%)                     | 822 (70.3%)                                             | 0.0043                          |
| 250-500 kb                                       | 26 (30.2%)                     | 267 (22.8%)                                             |                                 |
| 500-1000 kb                                      | 11 (12.8%)                     | 65 (5.6%)                                               |                                 |
| >1000 kb                                         | 2 (2.3%)                       | 15 (1.3%)                                               |                                 |

**Table S6. Differences in the Per-Genome CNV Metrics between RHD Cases and 1,993 Genetically Matched Controls**

| <b>Per-Genome CNV Metrics</b>          | <b>Cases<br/>n = 178</b> | <b>Controls<br/>n = 1,993</b> | <b>Asymptotic<br/>p Value<sup>#</sup></b> | <b>Empiric<br/>p Value<sup>##</sup></b> |
|----------------------------------------|--------------------------|-------------------------------|-------------------------------------------|-----------------------------------------|
| Average CNV Size [kb] (Median)         | 380.2 (230.7)            | 192.6 (164.8)                 | $9.5 \times 10^{-6}$                      | $1.2 \times 10^{-5}$                    |
| Average Largest CNV Size [kb] (Median) | 533.8 (288.7)            | 279.4 (190.5)                 | $5.6 \times 10^{-4}$                      | $5.6 \times 10^{-4}$                    |
| Average Total CNV Span [kb] (Median)   | 852.1 (402.7)            | 565.4 (275.1)                 | $5.7 \times 10^{-2}$                      | $5.8 \times 10^{-2}$                    |

<sup>#</sup> Non-parametric (Mann-Whitney U) test.

<sup>##</sup> 1,000,000 permutations.

**Table S7. Differences in Global CNV Counts between RHD Cases and Pediatric Controls from the CHOP Study**

| <b>Global CNV Metrics</b>                                | <b>CAKUT Cases<br/>(n = 192)</b> | <b>Pediatric Controls<br/>(n = 1,235)</b> | <b>p Value (Exact<br/>Test)</b> |
|----------------------------------------------------------|----------------------------------|-------------------------------------------|---------------------------------|
| Total number of rare CNVs                                | $N_{\text{cnv}} = 351$           | $N_{\text{cnv}} = 2,717$                  |                                 |
| <b>Size Distribution of All CNVs</b>                     |                                  |                                           |                                 |
| 100-250 kb                                               | 168 (47.9%)                      | 1,745 (64.2%)                             | $6.9 \times 10^{-13}$           |
| 250-500 kb                                               | 107 (30.5%)                      | 732 (26.9%)                               |                                 |
| 500-1000 kb                                              | 52 (14.8%)                       | 188 (6.9%)                                |                                 |
| > 1000 kb                                                | 24 (6.8%)                        | 52 (1.9%)                                 |                                 |
| <b>Size Distribution of Deletions</b>                    |                                  |                                           |                                 |
| 100-250 kb                                               | 77 (56.2%)                       | 1,525 (70.1%)                             | $6.4 \times 10^{-16}$           |
| 250-500 kb                                               | 28 (20.4%)                       | 546 (25.1%)                               |                                 |
| 500-1000 kb                                              | 16 (11.7%)                       | 94 (4.3%)                                 |                                 |
| > 1000 kb                                                | 16 (11.7%)                       | 11 (0.5%)                                 |                                 |
| <b>Size Distribution of Duplications</b>                 |                                  |                                           |                                 |
| 100-250 kb                                               | 91 (42.5%)                       | 220 (40.7%)                               | 0.262                           |
| 250-500 kb                                               | 79 (36.9%)                       | 186 (34.4%)                               |                                 |
| 500-1000 kb                                              | 36 (16.8%)                       | 94 (17.4%)                                |                                 |
| > 1000 kb                                                | 8 (3.7%)                         | 41 (7.6%)                                 |                                 |
| <b>Size Distribution of Gene-Disrupting Deletions</b>    |                                  |                                           |                                 |
| 100-250 kb                                               | 41 (47.1%)                       | 1,305 (68.0%)                             | $2.2 \times 10^{-16}$           |
| 250-500 kb                                               | 20 (23.0%)                       | 516 (26.9%)                               |                                 |
| 500-1000 kb                                              | 11 (12.6%)                       | 88 (4.6%)                                 |                                 |
| > 1000 kb                                                | 15 (17.2%)                       | 11 (0.6%)                                 |                                 |
| <b>Size Distribution of Gene-Disrupting Duplications</b> |                                  |                                           |                                 |
| 100-250 kb                                               | 65 (43.9%)                       | 186 (39.6%)                               | 0.235                           |
| 250-500 kb                                               | 44 (29.7%)                       | 161 (34.3%)                               |                                 |
| 500-1000 kb                                              | 32 (21.6%)                       | 83 (17.7%)                                |                                 |
| > 1000 kb                                                | 7 (4.7%)                         | 40 (8.5%)                                 |                                 |

**Table S8. Known Diagnostic Genomic Disorders Identified in 522 RHD Cases**

| Chr.                  | CNV Type | Start (Mb) | End (Mb) | Size (Mb) | Syndrome                                        | N. of genes | Segm. Dup. | Discovery Cohort (n = 192) | Repli. Cohort 1 (n = 196) | Repli. Cohort 2 (n = 134) | All cohorts (n = 522) | Controls (n = 13,839) | p Value                  | Sample                                                                                                                 | Extrarenal Phenotypes                               | De Novo or Inherited?                                                    | Prior Reported Association with Urinary Tract / Neuropsychiatric Phenotypes | Candidate Genes with mouse orthologs implicated in RHD |       |
|-----------------------|----------|------------|----------|-----------|-------------------------------------------------|-------------|------------|----------------------------|---------------------------|---------------------------|-----------------------|-----------------------|--------------------------|------------------------------------------------------------------------------------------------------------------------|-----------------------------------------------------|--------------------------------------------------------------------------|-----------------------------------------------------------------------------|--------------------------------------------------------|-------|
| 1p36                  | Dup      | 2.91       | 3.65     | 0.74      | 1p36 duplication <sup>1,2</sup>                 | 13          | None       | 0                          | 0                         | 2                         | 2                     | 0                     | 1.3 x 10 <sup>-3</sup>   | CHOP_2<br>CHOP_11                                                                                                      | N<br>N                                              | NA<br>NA                                                                 | N/Y                                                                         |                                                        |       |
| 1p22                  | Dup      | 89.50      | 89.97    | 0.47      | 1p22.2-31.1 duplication <sup>3</sup>            | 4           | Within-3'  | 0                          | 1                         | 1                         | 2                     | 0                     | 1.32x 10 <sup>-3</sup>   | MCD_14<br>CHOP_12                                                                                                      | Y<br>N                                              | NA<br>NA                                                                 | N/Y                                                                         |                                                        |       |
| 1q21                  | Del      | 144.11     | 144.63   | 0.52      | 1q21 TAR deletion <sup>4</sup>                  | 26          | 5'-3'      | 1                          | 0                         | 0                         | 1                     | 1                     | 0.07                     | POL_6                                                                                                                  | Y                                                   | NA                                                                       | Y/Y                                                                         |                                                        |       |
| 1q21                  | Del      | 144.80     | 145.86   | 1.06      | 1q21 distal deletion <sup>5</sup>               | 15          | 5'-3'      | 1                          | 3                         | 0                         | 4                     | 4                     | 1.1 x 10 <sup>-4</sup>   | POL_6<br>MCD_16<br>POL_15<br>POL_20                                                                                    | Y<br>N<br>N<br>N                                    | NA<br>Inherited <sup>d</sup><br>NA<br>NA                                 | Y/N                                                                         |                                                        |       |
| 1q43-q44              | Del      | 240.61     | 245.67   | 5.06      | 1q43-q44 deletion <sup>6</sup>                  | 41          | 5'-3'      | 1                          | 0                         | 0                         | 1                     | 0                     | 0.036                    | MCD_1                                                                                                                  | Y                                                   | De novo                                                                  | Y/Y                                                                         | SDCCAG8, KIF26B, NLRP3                                 |       |
| 2q37                  | Dup      | 240.99     | 242.44   | 1.45      | 2q37 deletion <sup>7</sup>                      | 40          | None       | 0                          | 1                         | 0                         | 1                     | 0                     | 0.036                    | POL_13                                                                                                                 | Y                                                   | NA                                                                       | Y/Y                                                                         |                                                        |       |
| 3p26                  | Dup      | 1.35       | 2.18     | 0.83      | 3pter-p25 deletion <sup>8</sup>                 | 2           | 5'-3'      | 2                          | 0                         | 0                         | 2                     | 8                     | 0.049                    | MCD_19<br>ITA_33                                                                                                       | Y<br>Y                                              | NA<br>Inherited <sup>d</sup>                                             | N/Y                                                                         |                                                        |       |
| 4p16 <sup>a</sup>     | Del      | 0.06       | 17.29    | 17.23     | Wolf-Hirschhorn <sup>9</sup>                    | 186         | 5'-within  | 0                          | 1                         | 1                         | 2                     | 0                     | 1.32 x 10 <sup>-3</sup>  | POL_18<br>CHOP_14                                                                                                      | Y<br>Y                                              | NA<br>NA                                                                 | Y/Y                                                                         | FGFRL1, FGFRL3, SLC2A9                                 |       |
| 5p15                  | Dup      | 0.11       | 10.96    | 10.85     | 5p distal duplication <sup>10-</sup>            | 78          | 5'-within  | 0                          | 0                         | 1                         | 1                     | 0                     | 0.036                    | CHOP_14                                                                                                                | Y                                                   | NA                                                                       | Y/Y                                                                         |                                                        |       |
| 5q14-q23              | Del      | 91.46      | 114.55   | 23.09     | 5q interstitial deletion <sup>13</sup>          | 89          | Within-3'  | 0                          | 0                         | 1                         | 1                     | 0                     | 0.036                    | CHOP_8                                                                                                                 | Y                                                   | NA                                                                       | N/Y                                                                         | MAN2A1, APC                                            |       |
| 6q13-q14              | Dup      | 70.29      | 70.76    | 0.47      | 6q13-q14 deletion <sup>14</sup>                 | 2           | Within     | 1                          | 0                         | 0                         | 1                     | 0                     | 0.036                    | ITA_2                                                                                                                  | N                                                   | NA                                                                       | Y/Y                                                                         |                                                        |       |
| 7p22                  | Dup      | 6.82       | 7.27     | 0.45      | 7p interstitial duplication <sup>15</sup>       | 3           | 5'-within  | 0                          | 0                         | 1                         | 1                     | 0                     | 0.036                    | CHOP_18                                                                                                                | Y                                                   | NA                                                                       | Y/Y                                                                         | C1GALT1                                                |       |
| 7p21                  | Dup      | 16.80      | 17.71    | 0.91      | 7p interstitial duplication <sup>15</sup>       | 3           | Within     | 0                          | 0                         | 1                         | 1                     | 1                     | 0.071                    | CHOP_1                                                                                                                 | Y                                                   | NA                                                                       | Y/Y                                                                         |                                                        |       |
| 7p15                  | Del      | 23.68      | 27.43    | 3.75      | 7p15.1-21.1 deletion <sup>16</sup>              | 43          | 5'-3'      | 0                          | 1                         | 0                         | 1                     | 0                     | 0.036                    | POL_9                                                                                                                  | N                                                   | NA                                                                       | Y/N                                                                         | HOXA11, HOXA13                                         |       |
| 7q34-q36 <sup>b</sup> | Del      | 141.53     | 158.81   | 17.28     | 7q36 deletion <sup>17</sup>                     | 255         | Within     | 1                          | 0                         | 1                         | 2                     | 0                     | 1.32 x 10 <sup>-3</sup>  | MCD_3<br>CHOP_9                                                                                                        | Y<br>Y                                              | De novo<br>NA                                                            | Y/Y                                                                         | GSTK1, NOS3, SHH                                       |       |
| 8p23                  | Dup      | 8.13       | 11.94    | 3.81      | 8p23.1 duplication <sup>18</sup>                | 42          | 5'-3'      | 1                          | 0                         | 0                         | 1                     | 1                     | 0.071                    | ITA_27                                                                                                                 | Y                                                   | NA                                                                       | Y/Y                                                                         | BLK                                                    |       |
| 9p22                  | Del      | 14.81      | 14.97    | 0.17      | 9p22.3 deletion <sup>19</sup>                   | 3           | Within-3'  | 0                          | 1                         | 0                         | 1                     | 0                     | 0.036                    | ITA_1                                                                                                                  | N                                                   | NA                                                                       | N/N                                                                         | FREM1 <sup>k</sup>                                     |       |
| 16p13                 | Dup      | 0.04       | 15.09    | 15.04     | 16p subtelomeric duplication <sup>20</sup>      | 323         | 5'-3'      | 0                          | 1                         | 0                         | 1                     | 0                     | 0.036                    | POL_21                                                                                                                 | Y                                                   | NA                                                                       | Y/Y                                                                         | AXIN1, IFT140, TSC2, PKD1, PDPK1                       |       |
| 16p13                 | Dup      | 15.03      | 15.80    | 0.77      | 16p13.11 duplication <sup>21</sup>              | 15          | 5'-3'      | 1                          | 0                         | 0                         | 1                     | 5                     | 0.199                    | ITA_32                                                                                                                 | N                                                   | NA                                                                       | N/Y                                                                         | MYH11                                                  |       |
| 16p11 <sup>c</sup>    | Del      | 29.55      | 31.86    | 2.31      | 16p11.2 distal deletion <sup>22,23</sup>        | 53          | 5'-3'      | 0                          | 2                         | 0                         | 2                     | 0                     | 1.32 x 10 <sup>-3</sup>  | MCD_5<br>POL_16                                                                                                        | N<br>Y                                              | NA<br>NA                                                                 | Y/Y                                                                         | TBX6                                                   |       |
| 16p11                 | Dup      | 29.50      | 30.05    | 0.55      | 16p11.2 distal duplication <sup>24</sup>        | 43          | 5'-3'      | 0                          | 0                         | 1                         | 1                     | 3                     | 0.138                    | CHOP_19                                                                                                                | N                                                   | NA                                                                       | N/Y                                                                         | TBX6                                                   |       |
| 17p11-p12             | Dup      | 16.41      | 20.23    | 3.82      | Potocki-Lupski syndrome <sup>25</sup>           | 96          | 5'-3'      | 1                          | 0                         | 1                         | 2                     | 0                     | 1.32 x 10 <sup>-3</sup>  | POL_3<br>CHOP_4                                                                                                        | N<br>Y                                              | NA<br>NA                                                                 | Y/Y                                                                         | FLCN, TOM1L2, B9D1                                     |       |
| 17q11-q12             | Del      | 31.89      | 33.35    | 1.46      | RCAD (renal cysts and diabetes) <sup>26</sup>   | 19          | 5'-3'      | 5                          | 5                         | 1                         | 11                    | 0                     | 1.32 x 10 <sup>-16</sup> | ITA_7<br>ITA_40<br>POL_10<br>ITA_34<br>ITA_21<br>MCD_17<br>ITA_36 <sup>e</sup><br>POL_17<br>POL_19<br>ITA_30<br>CHOP_3 | N<br>Y<br>N<br>N<br>N<br>N<br>N<br>N<br>N<br>Y<br>Y | NA<br>De novo<br>De novo<br>NA<br>NA<br>NA<br>NA<br>NA<br>NA<br>NA<br>NA | Y/Y                                                                         |                                                        | HNF1B |
| 17q11-q12             | Dup      | 31.89      | 33.25    | 1.36      | 17q12 duplication <sup>26</sup>                 | 18          | 5'-3'      | 1                          | 0                         | 0                         | 1                     | 1                     | 0.071                    | ITA_39                                                                                                                 | Y                                                   | NA                                                                       | Y/Y                                                                         |                                                        |       |
| 17q21                 | Del      | 40.94      | 41.41    | 0.47      | 17q21.31 deletion <sup>27</sup>                 | 11          | 5'-3'      | 1                          | 0                         | 0                         | 1                     | 2                     | 0.105                    | POL_4                                                                                                                  | N                                                   | NA                                                                       | Y/Y                                                                         | LHX1                                                   |       |
| 20p11-p13             | Dup      | 0.11       | 24.77    | 24.66     | 20p partial trisomy <sup>28</sup>               | 224         | NA         | 0                          | 1                         | 0                         | 1                     | 0                     | 0.036                    | MCD_14                                                                                                                 | Y                                                   | NA                                                                       | Y/Y                                                                         | JAG1, PAX1, THBD                                       |       |
| 21q22                 | Del      | 40.51      | 46.91    | 6.40      | 21q partial monosomy <sup>29</sup>              | 134         | Within-3'  | 0                          | 0                         | 1                         | 1                     | 0                     | 0.036                    | CHOP_6                                                                                                                 | Y                                                   | NA                                                                       | N/Y                                                                         | CBS, SLC19A1                                           |       |
| 22q11                 | Dup      | 15.29      | 18.61    | 3.32      | 22q11.2 duplication (VCFS region) <sup>30</sup> | 77          | 5'-3'      | 0                          | 1                         | 0                         | 1                     | 0                     | 0.036                    | POL_13                                                                                                                 | Y                                                   | NA                                                                       | Y/Y                                                                         |                                                        |       |

|                    |      |        |        |      |                                                                   |     |       |   |   |   |   |   |                         |                                                                             |                  |                                                                   |     |                 |
|--------------------|------|--------|--------|------|-------------------------------------------------------------------|-----|-------|---|---|---|---|---|-------------------------|-----------------------------------------------------------------------------|------------------|-------------------------------------------------------------------|-----|-----------------|
| 22q11              | Del  | 17.27  | 19.79  | 2.52 | DiGeorge/VCFS deletion <sup>31</sup>                              | 71  | 5'-3' | 3 | 1 | 0 | 4 | 0 | 1.73 x 10 <sup>-6</sup> | ITA_35<br>ITA_25 <sup>f</sup><br>ITA_13 <sup>f</sup><br>CZEC_1 <sup>f</sup> | Y<br>N<br>N<br>N | NA<br>Inherited <sup>d</sup><br>Inherited <sup>d</sup><br>De Novo | Y/Y |                 |
| 22q13 <sup>g</sup> | Del  | 42.94  | 49.52  | 6.58 | Phelan-McDermid <sup>32</sup>                                     | 102 | 5'-3' | 0 | 1 | 1 | 2 | 0 | 1.32 x 10 <sup>-3</sup> | POL_21<br>CHOP_3                                                            | Y<br>Y           | NA<br>NA                                                          | Y/Y | UPK3A,<br>WNT7B |
| X                  | Gain | XXY    | XXY    | --   | Klinefelter's syndrome <sup>33</sup>                              | --  | NA    | 1 | 0 | 0 | 1 | 0 | 0.044                   | ITA_4                                                                       | N                | NA                                                                | Y/Y |                 |
| Xp22               | Del  | 6.46   | 8.10   | 1.64 | Xp22.31 deletion <sup>34</sup>                                    | 6   | 5'-3' | 2 | 0 | 0 | 2 | 0 | 1.92 x 10 <sup>-3</sup> | ITA_17<br>POL_12                                                            | N<br>N           | NA<br>NA                                                          | Y/Y |                 |
| Xp22               | Dup  | 8.19   | 8.67   | 0.48 | Kallman's syndrome region (KAL1) <sup>35</sup>                    | 3   | 5'-3' | 2 | 1 | 0 | 3 | 4 | 2.58 x 10 <sup>-3</sup> | ITA_43<br>ITA_6<br>POL_14 <sup>h</sup>                                      | N<br>N<br>N      | NA<br>NA<br>NA                                                    | Y/Y |                 |
| Xq27               | Dup  | 139.36 | 139.91 | 0.55 | Mental Retardation with panhypopituitarism syndrome <sup>36</sup> | 4   | 5'-3' | 1 | 0 | 0 | 1 | 0 | 0.044                   | MCD_13 <sup>d</sup>                                                         | Y                | NA                                                                | N/Y |                 |

ITA=Italy; MCD=Macedonia; POL=Poland; CRO=Croatia; CRHF=Czech Republic; CHOP=Children Hospital of Philadelphia. Segm. Dup=Segmental Duplications. <sup>a</sup>The CNV in case CHOP\_14 spans 5.81 Mb and is included in the larger 17.23 MB deletion. <sup>b</sup>The CNV in case CHOP\_9 spans 7.3 Mb and is included in the larger 17.28 deletion. <sup>c</sup>The CNV in case MCD\_5 spans 690 Kb and is included in the larger 2.31 deletion. <sup>d</sup>This case was found to have XX caryotype with male phenotype and hypospadias. <sup>e</sup>This case was found to have a small 90 Kb deletion involving DDX52 and TCF2 genes at the RCAD locus. <sup>f</sup>These three individuals shared smaller 370-410 kb deletions included in the larger 2.52 deletion. <sup>g</sup>Cases POL\_21 and CHOP\_3 harbor overlapping deletions of 6.39 Mb and 5.04 Mb, respectively. <sup>h</sup>This case carries a smaller 100 Kb duplication affecting the KAL1 gene. <sup>i</sup>Segregating CNVs; <sup>j</sup>No family history of nephropathy. <sup>k</sup>homozygous mutations in *FREMI* produce Bifid Nose with or without Anorectal and Renal Anomalies (BNAR; OMIM 608980), but heterozygous mutations are only associated with craniosynostosis (ref 19 below).

## References

- Gajecka M, Mackay KL, Shaffer LG. Monosomy 1p36 deletion syndrome. *Am J Med Genet C Semin Med Genet* 2007;145C:346-56.
- Garcia-Heras J, Corley N, Garcia MF, Kukolich MK, Smith KG, Day DW. De novo partial duplications 1p: report of two new cases and review. *Am J Med Genet* 1999;82:261-4.
- Lo IF, Cheung LY, Ng AY, Lam ST. Interstitial Dup(1p) with findings of Kabuki make-up syndrome. *Am J Med Genet*. 1998 ;78(1):55-7.
- Klopocki E, Schulze H, Strauss G, et al. Complex inheritance pattern resembling autosomal recessive inheritance involving a microdeletion in thrombocytopenia-absent radius syndrome. *Am J Hum Genet* 2007;80:232-40.
- Brunetti-Pierri N, Berg JS, Scaglia F, et al. Recurrent reciprocal 1q21.1 deletions and duplications associated with microcephaly or macrocephaly and developmental and behavioral abnormalities. *Nat Genet* 2008;40:1466-71.
- Beemer FA, Klep-de Pater JM, Sepers GJ, Janssen B. Two cases of interstitial deletion of the long arm of chromosome 1: del(1)(q21----q25) and del(1)(q41----q43). *Clin Genet* 1985;27:515-9.
- Galasso C, Lo-Castro A, Lalli C, Nardone AM, Gullotta F, Curatolo P. Deletion 2q37: an identifiable clinical syndrome with mental retardation and autism. *J Child Neurol* 2008;23:802-6.
- Schwytzer U, Binkert F, Caflisch U, Baumgartner B, Schinzel A. Terminal deletion of the short arm of chromosome 3, del(3pter-p25): a recognizable syndrome. *Helv Paediatr Acta* 1987;42:309-15.
- Bergemann AD, Cole F, Hirschhorn K. The etiology of Wolf-Hirschhorn syndrome. *Trends Genet* 2005;21:188-95.
- Harrison KJ, Teshima IE, Silver MM, et al. Partial tetrasomy with triplication of chromosome (5) (p14-p15.33) in a patient with severe multiple congenital anomalies. *Am J Med Genet* 1998;79:103-7.
- Chia NL, Bousfield LR, Johnson BH. A case report of a de novo tandem duplication (5p) (p14----pter). *Clin Genet* 1987;31:65-9.
- Cervera M, Sanchez S, Molina B, et al. Trisomy of the short arm of chromosome 5 due to a de novo inversion and duplication (5)(p15.3 p13.3). *Am J Med Genet A* 2005;136A:381-5.
- Garcia-Minaur S, Ramsay J, Grace E, Minns RA, Myles LM, FitzPatrick DR. Interstitial deletion of the long arm of chromosome 5 in a boy with multiple congenital anomalies and mental retardation: Molecular characterization of the deleted region to 5q22.3q23.3. *Am J Med Genet A* 2005;132:402-10.
- McNeal RM, Skoglund RR, Francke U. Congenital anomalies including the VATER association in a patient with del(6)q deletion. *J Pediatr* 1977;91:957-60.
- Reish O, Berry SA, Dewald G, King RA. Duplication of 7p: further delineation of the phenotype and restriction of the critical region to the distal part of the short arm. *Am J Med Genet* 1996;61:21-5.
- Hoover-Fong JE, Cai J, Cargile CB, et al. Facial dysgenesis: a novel facial syndrome with chromosome 7 deletion p15.1-21.1. *Am J Med Genet A* 2003;117A:47-56.
- Caselli R, Mencarelli MA, Papa FT, et al. Delineation of the phenotype associated with 7q36.1q36.2 deletion: long QT syndrome, renal hypoplasia and mental retardation. *Am J Med Genet A* 2008;146A:1195-9.
- Barber JC, Maloney VK, Huang S, et al. 8p23.1 duplication syndrome; a novel genomic condition with unexpected complexity revealed by array CGH. *Eur J Hum Genet* 2008;16:18-27.

19. Vissers LE, Cox TC, Maga AM, et al. Heterozygous mutations of *FREM1* are associated with an increased risk of isolated metopic craniosynostosis in humans and mice. *PLoS Genet* 2011;7:e1002278.
20. Digilio MC, Bernardini L, Capalbo A, et al. 16p subtelomeric duplication: a clinically recognizable syndrome. *Eur J Hum Genet* 2009;17:1135-40.
21. Nagamani SC, Erez A, Bader P, et al. Phenotypic manifestations of copy number variation in chromosome 16p13.11. *Eur J Hum Genet* 2011;19:280-6.
22. Hernando C, Plaja A, Rigola MA, et al. Comparative genomic hybridisation shows a partial de novo deletion 16p11.2 in a neonate with multiple congenital malformations. *J Med Genet* 2002;39:E24.
23. Hanson E, Nasir RH, Fong A, et al. Cognitive and behavioral characterization of 16p11.2 deletion syndrome. *J Dev Behav Pediatr* 2010;31:649-57.
24. Fernandez BA, Roberts W, Chung B, et al. Phenotypic spectrum associated with de novo and inherited deletions and duplications at 16p11.2 in individuals ascertained for diagnosis of autism spectrum disorder. *J Med Genet* 2010;47:195-203.
25. Potocki L, Bi W, Treadwell-Deering D, et al. Characterization of Potocki-Lupski syndrome (dup(17)(p11.2p11.2)) and delineation of a dosage-sensitive critical interval that can convey an autism phenotype. *Am J Hum Genet* 2007;80:633-49.
26. Mefford HC, Clauin S, Sharp AJ, et al. Recurrent reciprocal genomic rearrangements of 17q12 are associated with renal disease, diabetes, and epilepsy. *Am J Hum Genet* 2007;81:1057-69.
27. Shaw-Smith C, Pittman AM, Willatt L, et al. Microdeletion encompassing *MAPT* at chromosome 17q21.3 is associated with developmental delay and learning disability. *Nat Genet* 2006;38:1032-7.
28. Oppenheimer S, Dignan P, Soukup S. Partial trisomy 20p: familial occurrence. *Am J Med Genet* 2000;95:316-9.
29. Roberson ED, Wohler ES, Hoover-Fong JE, et al. Genomic analysis of partial 21q monosomies with variable phenotypes. *Eur J Hum Genet* 2011;19:235-8.
30. Lo-Castro A, Galasso C, Cerminara C, et al. Association of syndromic mental retardation and autism with 22q11.2 duplication. *Neuropediatrics* 2009;40:137-40.
31. Shprintzen RJ. Velocardiofacial syndrome and DiGeorge sequence. *J Med Genet* 1994;31:423-4.
32. Bonaglia MC, Giorda R, Beri S, et al. Molecular mechanisms generating and stabilizing terminal 22q13 deletions in 44 subjects with Phelan/McDermid Syndrome. *PLoS Genet* 2011;7:e1002173.
33. Polani PE, Bishop PM, Lennox B, Ferguson-Smith MA, Stewart JS, Prader A. Colour vision studies and the x-chromosome constitution of patients with Klinefelter's syndrome. *Nature* 1958;182:1092-3.
34. Ballabio A, Bardoni B, Carozzo R, et al. Contiguous gene syndromes due to deletions in the distal short arm of the human X chromosome. *Proc Natl Acad Sci U S A* 1989;86:10001-5.
35. Franco B, Guioli S, Pragliola A, et al. A gene deleted in Kallmann's syndrome shares homology with neural cell adhesion and axonal path-finding molecules. *Nature* 1991;353:529-36.
36. Lagerstrom-Fermer M, Sundvall M, Johnsen E, et al. X-linked recessive panhypopituitarism associated with a regional duplication in Xq25-q26. *Am J Hum Genet* 1997;60:910-6.

**Table S9. CNV Burden Analysis in 167 RHD Cases in the Discovery Cohort after Exclusion of 25 Cases with Known Genomic Disorders**

|                                        | <b>Cases<br/>(n = 167)</b> | <b>Controls<br/>(n = 4,733)</b> | <b>Asymptotic<br/>p Value<sup>a</sup></b> | <b>Empiric<br/>p Value<sup>b</sup></b> |
|----------------------------------------|----------------------------|---------------------------------|-------------------------------------------|----------------------------------------|
| Average CNV rate                       | 1.54                       | 1.68                            | 0.18                                      | 0.77                                   |
| Average CNV size [kb] (median)         | 317.4 (198.8)              | 197.1 (161.1)                   | $8.0 \times 10^{-3}$                      | $7.9 \times 10^{-3}$                   |
| Average largest CNV size [kb] (median) | 380.8 (248.4)              | 260.4 (178.5)                   | $1.4 \times 10^{-2}$                      | $1.4 \times 10^{-2}$                   |
| Average total CNV span [kb] (median)   | 547.8 (362.0)              | 476.1 (234.2)                   | $3.3 \times 10^{-2}$                      | $3.3 \times 10^{-2}$                   |

<sup>a</sup>Non-parametric (Mann-Whitney U) test for quantitative variables; Poisson rate ratio test for rates, and Fisher exact test for proportions.

<sup>b</sup>Based on 1,000,000 permutations.

**Table S10. Novel or Rare Genomic Disorders in RHD**

| Chr.                  | CNV Type | Start (Mb) | End (Mb) | Size (Mb) | N. of genes | Segm. Dup. | Discov. Cohort (n = 192) | Repli 1 Cohort (n = 196) | Repli 2 Cohort (n = 134) | All Cohorts (n = 522) | Controls (n = 13,839) | p Value                 | Sample           | Extrarenal Phenotypes | De Novo or Inherited?        | Candidate Genes with Mouse Orthologs Implicated in RHD |
|-----------------------|----------|------------|----------|-----------|-------------|------------|--------------------------|--------------------------|--------------------------|-----------------------|-----------------------|-------------------------|------------------|-----------------------|------------------------------|--------------------------------------------------------|
| 1p36                  | Del      | 12.78      | 13.25    | 0.47      | 10          | 5'-3'      | 1                        | 0                        | 0                        | 1                     | 0                     | 0.036                   | ITA_38           | N                     | NA                           |                                                        |
| 1p32                  | Del      | 57.97      | 58.44    | 0.47      | 4           | Within     | 0                        | 1                        | 0                        | 1                     | 0                     | 0.036                   | ITA_22           | Y                     | Inherited <sup>c</sup>       |                                                        |
| 1q32                  | Del      | 162.68     | 163.19   | 0.51      | 3           | 5'-Within  | 0                        | 1                        | 0                        | 1                     | 0                     | 0.036                   | CRO_2            | N                     | De novo                      | PBX1                                                   |
| 1q42                  | Del      | 223.78     | 224.08   | 0.30      | 6           | 5'-3'      | 1                        | 0                        | 0                        | 1                     | 0                     | 0.036                   | POL_4            | N                     | NA                           |                                                        |
| 2p25 <sup>a</sup>     | Dup      | 0.02       | 3.65     | 3.63      | 33          | 5'-3'      | 1                        | 0                        | 1                        | 2                     | 0                     | 1.32 x 10 <sup>-3</sup> | ITA_2<br>CHOP_3  | N<br>Y                | NA<br>NA                     |                                                        |
| 2p11                  | Dup      | 88.16      | 89.24    | 1.08      | 17          | 5'-3'      | 0                        | 0                        | 1                        | 1                     | 0                     | 0.036                   | CHOP_15          | N                     | NA                           |                                                        |
| 2p11                  | Del      | 89.39      | 89.88    | 0.49      | 3           | 5'-3'      | 0                        | 0                        | 1                        | 1                     | 1                     | 0.071                   | CHOP_5           | N                     | NA                           |                                                        |
| 2q12                  | Del      | 104.97     | 105.19   | 0.22      | 1           | None       | 1                        | 0                        | 0                        | 1                     | 0                     | 0.036                   | ITA_5            | N                     | NA                           |                                                        |
| 2q32                  | Dup      | 190.87     | 191.31   | 0.44      | 4           | Within     | 1                        | 0                        | 0                        | 1                     | 0                     | 0.036                   | POL_8            | N                     | NA                           |                                                        |
| 3q13-q22              | Del      | 118.15     | 133.11   | 14.96     | 186         | Within-3'  | 1                        | 0                        | 0                        | 1                     | 0                     | 0.036                   | POL_1            | Y                     | De novo                      | GSK3B, GPR156, FSTL1, GATA2, HGD                       |
| 3q29                  | Dup      | 199.17     | 199.32   | 0.15      | 3           | 5'-3'      | 1                        | 1                        | 0                        | 2                     | 3                     | 0.012                   | ITA_45<br>MCD_12 | Y<br>N                | NA<br>NA                     |                                                        |
| 4p16                  | Dup      | 7.27       | 7.76     | 0.49      | 2           | Within     | 0                        | 1                        | 0                        | 1                     | 0                     | 0.036                   | MCD_18           | N                     | NA                           |                                                        |
| 4p13                  | Dup      | 44.12      | 44.75    | 0.63      | 4           | Within-3'  | 1                        | 0                        | 0                        | 1                     | 0                     | 0.036                   | ITA_8            | N                     | De novo                      |                                                        |
| 4q28                  | Dup      | 141.35     | 141.81   | 0.46      | 9           | Within     | 0                        | 1                        | 0                        | 1                     | 0                     | 0.036                   | ITA_44           | N                     | Inherited <sup>b</sup>       |                                                        |
| 5q34                  | Dup      | 159.53     | 160.58   | 1.05      | 10          | 3'         | 0                        | 2                        | 0                        | 2                     | 0                     | 1.32 x 10 <sup>-3</sup> | MCD_8<br>MCD_9   | N<br>N                | NA<br>NA                     |                                                        |
| 7p12                  | Del      | 47.76      | 48.52    | 0.76      | 8           | Within     | 0                        | 1                        | 0                        | 1                     | 0                     | 0.036                   | CRO_1            | N                     | NA                           |                                                        |
| 7q21                  | Del      | 79.33      | 80.91    | 1.58      | 4           | Within     | 0                        | 1                        | 0                        | 1                     | 0                     | 0.036                   | MCD_10<br>CRO_4  | N<br>N                | NA<br>Inherited <sup>c</sup> | CD36                                                   |
| 7q22                  | Del      | 104.41     | 104.81   | 0.40      | 5           | Within     | 0                        | 0                        | 1                        | 1                     | 0                     | 0.036                   | CHOP_7           | Y                     | NA                           |                                                        |
| 9q33                  | Dup      | 115.20     | 116.61   | 0.41      | 0           | Within     | 0                        | 0                        | 1                        | 1                     | 0                     | 0.036                   | CHOP_13          | Y                     | NA                           |                                                        |
| 10p11                 | Dup      | 42.10      | 42.71    | 0.61      | 13          | 5'-3'      | 2                        | 0                        | 0                        | 2                     | 0                     | 1.32 x 10 <sup>-3</sup> | POL_10<br>MCD_7  | N<br>Y                | NA<br>NA                     |                                                        |
| 11p11                 | Dup      | 49.58      | 50.52    | 0.94      | 8           | 5'-Within  | 0                        | 2                        | 0                        | 2                     | 1                     | 3.86 x 10 <sup>-3</sup> | ITA_23<br>CRO_3  | N<br>N                | NA<br>NA                     |                                                        |
| 12q21                 | Del      | 83.69      | 84.31    | 0.62      | 5           | None       | 1                        | 0                        | 0                        | 1                     | 2                     | 0.105                   | ITA_17           | N                     | NA                           |                                                        |
| 12q24                 | Del      | 120.38     | 120.83   | 0.46      | 14          | None       | 0                        | 0                        | 1                        | 1                     | 0                     | 0.036                   | CHOP_9           | Y                     | NA                           |                                                        |
| 12q24                 | Dup      | 124.67     | 132.29   | 7.52      | 65          | Within     | 1                        | 0                        | 0                        | 1                     | 0                     | 0.036                   | MCD_3            | Y                     | De novo                      |                                                        |
| 13q11                 | Del      | 22.44      | 23.80    | 1.36      | 14          | 5'-3'      | 1                        | 0                        | 0                        | 1                     | 3                     | 0.138                   | ITA_46           | Y                     | De novo                      |                                                        |
| 13q12                 | Dup      | 28.14      | 28.77    | 0.63      | 3           | 5'-3'      | 1                        | 0                        | 0                        | 1                     | 0                     | 0.036                   | ITA_47           | Y                     | NA                           |                                                        |
| 13q12                 | Dup      | 36.28      | 37.51    | 1.23      | 11          | None       | 1                        | 0                        | 0                        | 1                     | 0                     | 0.036                   | MCD_3            | Y                     | Inherited <sup>d</sup>       |                                                        |
| 13q13                 | Dup      | 38.70      | 39.44    | 0.74      | 3           | 5'-3'      | 0                        | 0                        | 1                        | 1                     | 0                     | 0.036                   | CHOP_16          | N                     | NA                           |                                                        |
| 13q32                 | Del      | 99.39      | 99.82    | 0.43      | 3           | None       | 0                        | 0                        | 1                        | 1                     | 0                     | 0.036                   | CHOP_7           | Y                     | NA                           | PCCA                                                   |
| 15q13 <sup>&gt;</sup> | Del      | 40.90      | 41.33    | 0.43      | 7           | 5'-3'      | 1                        | 0                        | 0                        | 1                     | 0                     | 0.036                   | ITA_9            | N                     | Inherited <sup>c</sup>       |                                                        |
| 16p12 <sup>#</sup>    | Dup      | 21.51      | 21.66    | 0.15      | 3           | 5'-3'      | 1                        | 0                        | 0                        | 1                     | 8                     | 0.283                   | ITA_18           | N                     | NA                           |                                                        |
| 16q22                 | Del      | 73.39      | 73.90    | 0.51      | 9           | Within     | 1                        | 0                        | 0                        | 1                     | 0                     | 0.036                   | POL_7            | N                     | De novo                      |                                                        |
| 17p13                 | Dup      | 0.15       | 0.25     | 0.10      | 3           | 5'-3'      | 1                        | 0                        | 0                        | 1                     | 0                     | 0.036                   | ITA_19           | N                     | NA                           |                                                        |
| 17q25                 | Dup      | 71.00      | 78.63    | 7.63      | 222         | Within     | 0                        | 0                        | 1                        | 1                     | 0                     | 0.036                   | CHOP_9           | Y                     | NA                           | ITGB, JMJD6, TK1, SGSH, STRA13, ARHGDI                 |
| 20q13                 | Dup      | 60.32      | 60.81    | 0.49      | 11          | None       | 0                        | 0                        | 1                        | 1                     | 0                     | 0.036                   | CHOP_11          | N                     | NA                           | LAMA5,                                                 |



|       |     |       |       |      |    |        |   |   |   |   |   |       |         |   |                        | GATA5 |
|-------|-----|-------|-------|------|----|--------|---|---|---|---|---|-------|---------|---|------------------------|-------|
| 21p11 | Dup | 9.81  | 10.21 | 0.40 | 5  | Within | 0 | 1 | 0 | 1 | 0 | 0.036 | ITA_31  | N | Inherited <sup>b</sup> |       |
| 21p11 | Dup | 13.52 | 14.20 | 0.68 | 4  | 5'-3'  | 0 | 0 | 1 | 1 | 2 | 0.105 | CHOP_10 | N | NA                     |       |
| 21q22 | Del | 36.33 | 37.14 | 0.81 | 14 | Within | 0 | 0 | 1 | 1 | 0 | 0.036 | CHOP_17 | N | NA                     |       |

ITA = Italy; MCD = Macedonia; POL = Poland; CRO = Croatia; CRHF = Czech Republic; CHOP = Children Hospital of Philadelphia. Segm. Dup.=Segmental Duplications.

<sup>a</sup>The CNV in case ITA\_2 spans 770 Kb and is included in the larger 3.63 Mb duplication. <sup>b</sup>Segregating CNVs; <sup>c</sup>No family history of nephropathy; <sup>d</sup>inherited in a case where family history was unknown, <sup>e</sup>non-discernible.

**Table S11. Individuals with Multiple Diagnostic or Novel Large CNVs**

| Case ID (Cohort) | Extrarenal Defects | Locus     | CNV Type | Name                              | Chr. | Start  | End    | Size  | N. Gene | Inheritance |
|------------------|--------------------|-----------|----------|-----------------------------------|------|--------|--------|-------|---------|-------------|
| ITA_17           | N                  | Xp22      | Del      | Xp22.31 deletion                  | X    | 6.46   | 8.1    | 1.64  | 6       | NA          |
| (Disc)           | N                  | 12q21     | Del      | Novel                             | 12   | 83.69  | 84.31  | 0.62  | 5       | NA          |
| ITA_2            | N                  | 6q13-q14  | Dup      | 6q13-q14 deletion                 | 6    | 70.29  | 70.76  | 0.47  | 2       | NA          |
| (Disc)           | N                  | 2p25      | Dup      | Novel                             | 2    | 0.02   | 3.65   | 3.63  | 33      | NA          |
| MCD_3            | Y                  | 7q34-q36  | Del      | 7q36 deletion17                   | 7    | 141.53 | 158.81 | 17.28 | 255     | De novo     |
| (Disc)           | Y                  | 12q24     | Dup      | Novel                             | 12   | 124.67 | 132.29 | 7.52  | 65      | De novo     |
|                  | Y                  | 13q12     | Dup      | Novel                             | 13   | 36.28  | 37.51  | 1.23  | 11      | Inherited   |
| POL_10           | N                  | 17q11-q12 | Del      | RCAD (renal cysts and diabetes)   | 17   | 31.89  | 33.35  | 1.46  | 19      | De novo     |
| (Disc)           | N                  | 10p11     | Dup      | Novel                             | 10   | 42.1   | 42.71  | 0.61  | 13      | NA          |
| POL_4            | N                  | 17q21     | Del      | 17q21.31 deletion (MAPT)          | 17   | 40.94  | 41.41  | 0.47  | 11      | NA          |
| (Disc)           | N                  | 1q42      | Del      | Novel                             | 1    | 223.78 | 224.08 | 0.3   | 6       | NA          |
| POL_6            | Y                  | 1q21      | Del      | 1q21 TAR deletion                 | 1    | 144.11 | 144.63 | 0.52  | 26      | NA          |
| (Disc)           | Y                  | 1q21      | Del      | 1q21 distal deletion              | 1    | 144.8  | 145.86 | 1.06  | 15      | NA          |
| MCD_14           | Y                  | 1p22      | Dup      | 1p22.2-31.1 deletion              | 1    | 89.5   | 89.97  | 0.47  | 4       | NA          |
| (Repli 1)        | Y                  | 20p11-p13 | Dup      | 20p partial trisomy               | 20   | 0.11   | 24.77  | 24.66 | 224     | NA          |
| POL_13           | Y                  | 2q37      | Dup      | 2q37 deletion                     | 2    | 240.99 | 242.44 | 1.45  | 40      | NA          |
| (Repli 1)        | Y                  | 22q11     | Dup      | 22q11.2 duplication (VCFS region) | 22   | 15.29  | 18.61  | 3.32  | 77      | NA          |
| POL_21           | Y                  | 16p13     | Dup      | 16p subtelomeric duplication      | 16   | 0.04   | 15.09  | 15.04 | 323     | NA          |
| (Repli 1)        | Y                  | 22q13     | Del      | Phelan-McDermid                   | 22   | 42.94  | 49.52  | 6.58  | 102     | NA          |
| CHOP_11          | N                  | 1p36      | Dup      | 1p36 duplication                  | 1    | 2.91   | 3.65   | 0.74  | 13      | NA          |
| (Repli 2)        | N                  | 20q13     | Dup      | Novel                             | 20   | 60.32  | 60.81  | 0.49  | 11      | NA          |
| CHOP_14          | Y                  | 4p16      | Del      | Wolf-Hirschhorn                   | 4    | 0.06   | 17.29  | 17.23 | 186     | NA          |
| (Repli 2)        | Y                  | 5p15      | Dup      | 5p distal duplication             | 5    | 0.11   | 10.96  | 10.85 | 78      | NA          |
| CHOP_3           | Y                  | 17q11-q12 | Del      | RCAD (renal cysts and diabetes)   | 17   | 31.89  | 33.35  | 1.46  | 19      | NA          |
| (Repli 2)        | Y                  | 22q13     | Del      | Phelan-McDermid                   | 22   | 42.94  | 49.52  | 6.58  | 102     | NA          |
|                  | Y                  | 2p25      | Dup      | Novel                             | 2    | 0.02   | 3.65   | 3.63  | 33      | NA          |
| CHOP_7           | Y                  | 7q22      | Del      | Novel                             | 7    | 104.41 | 104.81 | 0.4   | 5       | NA          |
| (Repli 2)        | Y                  | 13q32     | Del      | Novel                             | 13   | 99.39  | 99.82  | 0.43  | 3       | NA          |
| CHOP_9           | Y                  | 7q34-q36  | Del      | 7q36 deletion                     | 7    | 141.53 | 158.81 | 17.28 | 255     | NA          |
| (Repli 2)        | Y                  | 12q24     | Del      | Novel                             | 12   | 120.38 | 120.83 | 0.46  | 14      | NA          |
|                  | Y                  | 17q25     | Dup      | Novel                             | 17   | 71.00  | 78.63  | 7.63  | 222     | NA          |

Disc = Discovery cohort; Repli 1= Replication cohort 1; Repli 2 = Replication cohort 2.

**Table S12. Intergenic CNVs Identified in the Discovery Cohort and Absent in 13,839 Controls**

| Chr.  | CNV Type | Start (Mb) | End (Mb) | Size (Mb) | 5' Gene   | Dist (Kb) | 3' Gene   | Dist (Kb) | Segm. Dup. | Cases (n = 192) | Controls (n = 13,839) | P                      | Sample/Ethnicity | Extrarenal Phenotypes |
|-------|----------|------------|----------|-----------|-----------|-----------|-----------|-----------|------------|-----------------|-----------------------|------------------------|------------------|-----------------------|
| 2p16  | Del      | 55.82      | 55.90    | 0.08      | PNPT1     | 48.6      | EFEMP1    | 41.4      | 3'         | 1               | 0                     | 0.014                  | ITA_42           | N                     |
| 4p16  | Del      | 12.52      | 12.65    | 0.13      | BC042433  | 658.8     | HSP90Bb   | 297.8     | None       | 1               | 0                     | 0.014                  | ITA_29           | N                     |
| 4q26  | Del      | 115.60     | 115.67   | 0.07      | ARSJ      | 479.0     | UGT8      | 61.4      | None       | 1               | 0                     | 0.014                  | ITA_48           | Y                     |
| 4q28  | Del      | 131.30     | 131.54   | 0.24      | BC041448  | 206.8     | BC041865  | 1361.0    | None       | 1               | 0                     | 0.014                  | ITA_32           | N                     |
| 4q32  | Del      | 171.43     | 171.58   | 0.15      | AADAT     | 181.6     | BC047077  | 620.9     | None       | 1               | 0                     | 0.014                  | ITA_12           | N                     |
| 7p22  | Del      | 10.41      | 10.45    | 0.04      | NR_002790 | 771.3     | NDUFA4    | 491.2     | 3'         | 1               | 0                     | 0.014                  | ITA_20           | N                     |
| 7p21  | Dup      | 13.27      | 13.36    | 0.09      | ARL4A     | 575.0     | ETV1      | 535.3     | None       | 1               | 0                     | 0.014                  | ITA_24           | N                     |
| 7p21  | Del      | 17.05      | 17.08    | 0.03      | AGR3      | 159.5     | AHR       | 222.1     | None       | 1               | 0                     | 0.014                  | POL_2            | N                     |
| 7p15  | Dup      | 22.06      | 22.11    | 0.05      | CDCA7L    | 112.7     | RAPGEF5   | 15.2      | None       | 1               | 0                     | 0.014                  | ITA_41           | Y                     |
| 7q11  | Dup      | 61.68      | 62.34    | 0.66      | L37717    | 3978.3    | NR_003952 | 52.7      | 5'-3'      | 1               | 0                     | 0.014                  | POL_11           | N                     |
| 7q21  | Del      | 79.72      | 79.78    | 0.06      | GNAI1     | 38.3      | CD36      | 61.0      | None       | 1               | 0                     | 0.014                  | ITA_26           | Y                     |
| 7q33  | Dup      | 135.41     | 135.47   | 0.06      | MTPN      | 100.4     | CHRM2     | 731.7     | None       | 1               | 0                     | 0.014                  | ITA_18           | Y                     |
| 8q21  | Dup      | 88.51      | 88.62    | 0.11      | CNBD1     | 45.3      | WDR21C    | 333.2     | 5'         | 2               | 0                     | 1.7 x 10 <sup>-4</sup> | MCD_2<br>MCD_6   | Y<br>Y                |
| 8q24  | Del      | 138.32     | 138.41   | 0.09      | SALP      | 1594.5    | C8orfK32  | 802.2     | None       | 1               | 0                     | 0.014                  | ITA_3            | N                     |
| 8q24  | Del      | 142.65     | 142.95   | 0.30      | FLJ43860  | 60.5      | TSNARE1   | 344.3     | 5'-within  | 1               | 0                     | 0.014                  | POL_4            | Y                     |
| 9p24  | Del      | 3.68       | 3.71     | 0.03      | RFX3      | 166.9     | GLIS3     | 103.8     | None       | 1               | 0                     | 0.014                  | POL_5            | N                     |
| 9p23  | Del      | 11.10      | 11.85    | 0.75      | PTPRD     | 498.5     | TYRP1     | 831.4     | Within-3'  | 1               | 0                     | 0.014                  | ITA_17           | N                     |
| 9p13  | Del      | 29.74      | 29.93    | 0.19      | LINGO2    | 1034.1    | ACO1      | 2444.2    | None       | 1               | 0                     | 0.014                  | MCD_11           | N                     |
| 9q34  | Dup      | 136.52     | 136.59   | 0.07      | RXRA      | 43.3      | COL5A1    | 85.7      | 5'-3'      | 2               | 0                     | 1.7 x 10 <sup>-4</sup> | MCD_4<br>MCD_15  | N<br>N                |
| 10q21 | Del      | 59.21      | 59.52    | 0.31      | ZWINT     | 1424.1    | IPMK      | 100.2     | 3'         | 1               | 0                     | 0.014                  | POL_2            | N                     |
| 11p14 | Del      | 26.80      | 26.96    | 0.16      | SLC5A12   | 102.3     | FIBIN     | 8.3       | None       | 1               | 0                     | 0.014                  | ITA_10           | N                     |
| 12q21 | Del      | 76.40      | 76.56    | 0.16      | E2F7      | 414.1     | NAV3      | 189.6     | None       | 1               | 0                     | 0.014                  | ITA_11           | N                     |
| 15q15 | Del      | 51.02      | 51.40    | 0.38      | ONECUT1   | 149.6     | WDR72     | 189.2     | 5'         | 1               | 0                     | 0.014                  | ITA_16           | N                     |
| 21q21 | Del      | 26.87      | 26.95    | 0.08      | CYYR1     | 1.5       | ADAMTS1   | 182.1     | None       | 1               | 0                     | 0.014                  | ITA_29           | N                     |
| Xp22  | Dup      | 6..20      | 6.43     | 0.23      | NLGN4X    | 48.0      | VCX3A     | 33.6      | 3'         | 1               | 0                     | 0.014                  | ITA_37           | N                     |
| Xp22  | Del      | 22.71      | 22.77    | 0.06      | ZNF645    | 509.9     | DDX53     | 156.9     | None       | 1               | 0                     | 0.014                  | ITA_14           | N                     |
| Xp22  | Dup      | 25.52      | 25.89    | 0.37      | ARX       | 577.0     | MAGEB18   | 176.6     | Within     | 1               | 0                     | 0.014                  | ITA_28           | N                     |

ITA = Italy; MCD = Macedonia; POL = Poland; CRO = Croatia; CRHF = Czech Republic; CHOP = Children Hospital of Philadelphia. Segm. Dup.=Segmental Duplications.

**Table S13. Single-Gene CNVs Detected in the Discovery Cohort with No Overlap with 13,839 Controls**

| Chr.  | CNV Type | Start (Mb) | End (Mb) | Size (Mb) | Gene    | Sample | Extrarenal Phenotypes | Human Phenotype                                 | Mouse Model                                      | Expression in Urinary Tract |
|-------|----------|------------|----------|-----------|---------|--------|-----------------------|-------------------------------------------------|--------------------------------------------------|-----------------------------|
| 2p23  | Dup      | 29.38      | 29.49    | 0.11      | ALK     | ITA_12 | N                     | Neuroblastoma <sup>1</sup>                      | Behavioral phenotype <sup>2</sup>                | +                           |
| 2p16  | Del      | 55.88      | 56.02    | 0.13      | EFEMP1  | ITA_27 | Y                     | Doyne honey comb retinal dystrophy <sup>3</sup> | AMD-like deposits <sup>4</sup>                   | +                           |
| 2q12  | Dup      | 102.48     | 102.50   | 0.02      | SLC9A4  | ITA_24 | N                     | -                                               | Metabolic acidosis <sup>5</sup>                  | +                           |
| 2q12  | Del      | 104.96     | 105.19   | 0.23      | MRPS9   | ITA_5  | N                     | -                                               | -                                                | +                           |
| 2q22  | Dup      | 139.25     | 139.36   | 0.11      | NXP2    | MCD_1  | Y                     | -                                               | -                                                | +                           |
| 3q21  | Dup      | 127.33     | 127.34   | 0.01      | ALDH1L1 | ITA_24 | N                     | -                                               | Low reproductive efficiency <sup>6</sup>         | +                           |
| 10p15 | Del      | 3.01       | 3.12     | 0.11      | PFKP    | POL_12 | Y                     | -                                               | -                                                | +                           |
| 11q22 | Del      | 99.44      | 99.54    | 0.10      | CNTN5   | MCD_7  | Y                     | -                                               | Neuronal auditory system impairment <sup>7</sup> | -                           |
| 11q25 | Dup      | 130.24     | 130.66   | 0.42      | SNX19   | MCD_15 | N                     | -                                               | -                                                | +                           |
| 12q24 | Dup      | 112.83     | 113.04   | 0.21      | RBM19   | POL_7  | N                     | -                                               | Preimplantation embryonic lethality <sup>8</sup> | +                           |
| 13q12 | Del      | 34.58      | 34.92    | 0.34      | NBEA    | ITA_17 | N                     | Candidate for autism <sup>9</sup>               | Neuro-muscular paralysis <sup>10</sup>           | +                           |
| 16q11 | Dup      | 47.83      | 47.92    | 0.09      | CBLN1   | ITA_49 | Y                     | -                                               | Ataxia <sup>11</sup>                             | -                           |
| Xq11  | Dup      | 63.38      | 63.92    | 0.54      | MTMR8   | ITA_15 | N                     | -                                               | -                                                | -                           |

ITA=Italy; MCD=Macedonia; POL=Poland; CRO=Croatia; CRHF=Czech Republic; CHOP=Children Hospital of Philadelphia. Expression in urinary tract from GUDMAP microarray data.

## References

1. Mosse, Y.P. et al. Identification of ALK as a major familial neuroblastoma predisposition gene. *Nature* 455, 930-5 (2008).
2. Bilsland, J.G. et al. Behavioral and neurochemical alterations in mice deficient in anaplastic lymphoma kinase suggest therapeutic potential for psychiatric indications. *Neuropsychopharmacology* 33, 685-700 (2008).
3. Stone, E.M. et al. A single EFEMP1 mutation associated with both Malattia Leventinese and Doyne honeycomb retinal dystrophy. *Nat Genet* 22, 199-202 (1999).
4. Fu, L. et al. The R345W mutation in EFEMP1 is pathogenic and causes AMD-like deposits in mice. *Hum Mol Genet* 16, 2411-22 (2007).
5. Bourgeois, S. et al. NHE4 is critical for the renal handling of ammonia in rodents. *J Clin Invest* 120, 1895-904 (2010).
6. Champion, K.M., Cook, R.J., Tollaksen, S.L. & Giometti, C.S. Identification of a heritable deficiency of the folate-dependent enzyme 10-formyltetrahydrofolate dehydrogenase in mice. *Proc Natl Acad Sci U S A* 91, 11338-42 (1994).
7. Li, H. et al. Aberrant responses to acoustic stimuli in mice deficient for neural recognition molecule NB-2. *Eur J Neurosci* 17, 929-36 (2003).
8. Zhang, J., Tomasini, A.J. & Mayer, A.N. RBM19 is essential for preimplantation development in the mouse. *BMC Dev Biol* 8, 115 (2008).
9. Castermans, D. et al. The neurobeachin gene is disrupted by a translocation in a patient with idiopathic autism. *J Med Genet* 40, 352-6 (2003).
10. Su, Y. et al. Neurobeachin is essential for neuromuscular synaptic transmission. *J Neurosci* 24, 3627-36 (2004).
11. Hirai, H. et al. Cbln1 is essential for synaptic integrity and plasticity in the cerebellum. *Nat Neurosci* 8, 1534-41 (2005).
